# Supplementary material for: SLAMseq resolves the kinetics of maternal and zygotic gene expression in early zebrafish embryogenesis
Source: bioRxiv or medRxiv preprint supplement (doi:10.1101/2022.06.01.494399), 2022-06-02

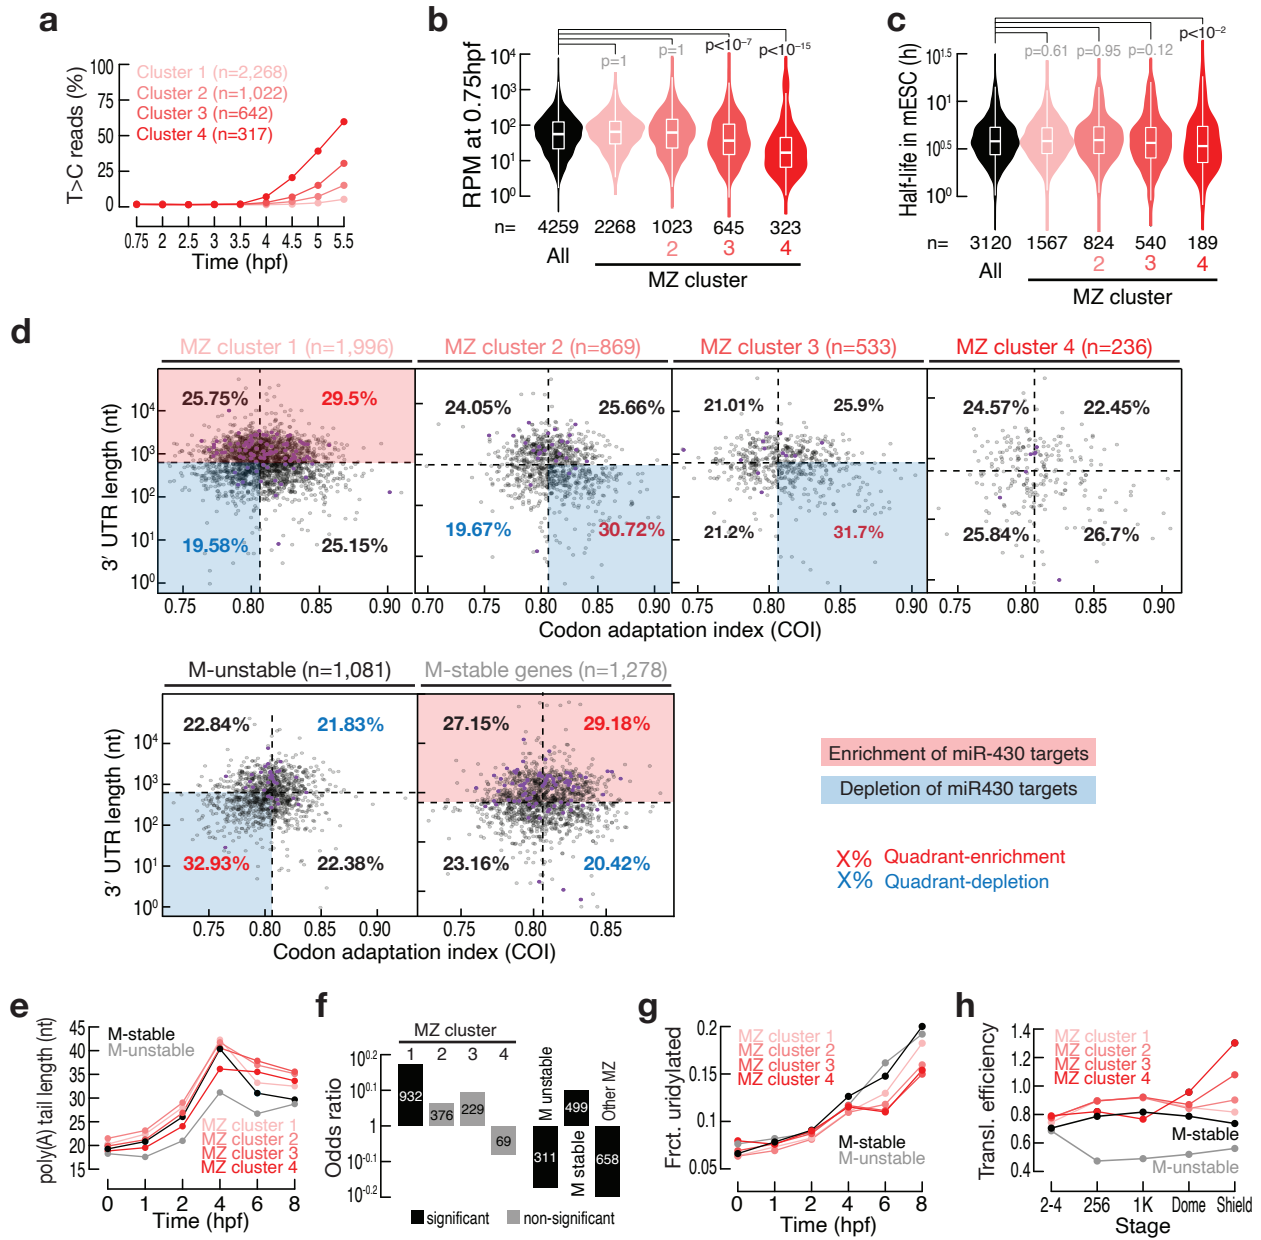

Supplement: Supplementary file [file media-5.pdf]
